# Supplementary material for: Enzyme-free glucose sensors with efficient synergistic electro-catalysis based on a ferrocene derivative and two metal nanoparticles
Source: Royal Society of Chemistry journal article supplement (doi:10.1039/d1ra09213h), 2022-01-01
Supplement: d1ra09213h1.pdf [file d1ra09213h1.pdf]

Supplementary Material for

**Enzyme-free glucose sensors with efficient synergistic electro-catalysis based on ferrocene derivative and two metal nanoparticles**

Tao Zhan<sup>a, b, 1</sup>, Xiao-Zhen Feng<sup>b, 1</sup>, Qi-Qi An<sup>b, 1</sup>, Shiyong Li<sup>a</sup>, Mingyue Xue<sup>b</sup>,  
Zhencheng Chen<sup>a, b, \*</sup>, Guo-Cheng Han<sup>b, \*</sup>, Heinz-Bernhard Kraatz<sup>c, \*\*</sup>

<sup>a</sup> College of Electronic Engineering and Automation, Guilin University of Electronic Technology, Guilin 541004, P. R. China

<sup>b</sup> School of Life and Environmental Sciences, Guilin University of Electronic Technology, Guilin 541004, P. R. China

<sup>c</sup> Department of Physical and Environmental Sciences, University of Toronto Scarborough, Toronto, Ontario M1C 1A4, Canada

<sup>1</sup>These authors contributed equally to the work.

\*Corresponding authors. E-mail: [chenzhch1965@163.com](mailto:chenzhch1965@163.com) (C. Z. Chen), [hanc81@guet.edu.cn](mailto:hanc81@guet.edu.cn) (G.-C. Han). \*\*Corresponding authors. E-mail: [bernie.kraatz@utoronto.ca](mailto:bernie.kraatz@utoronto.ca) (HBK).

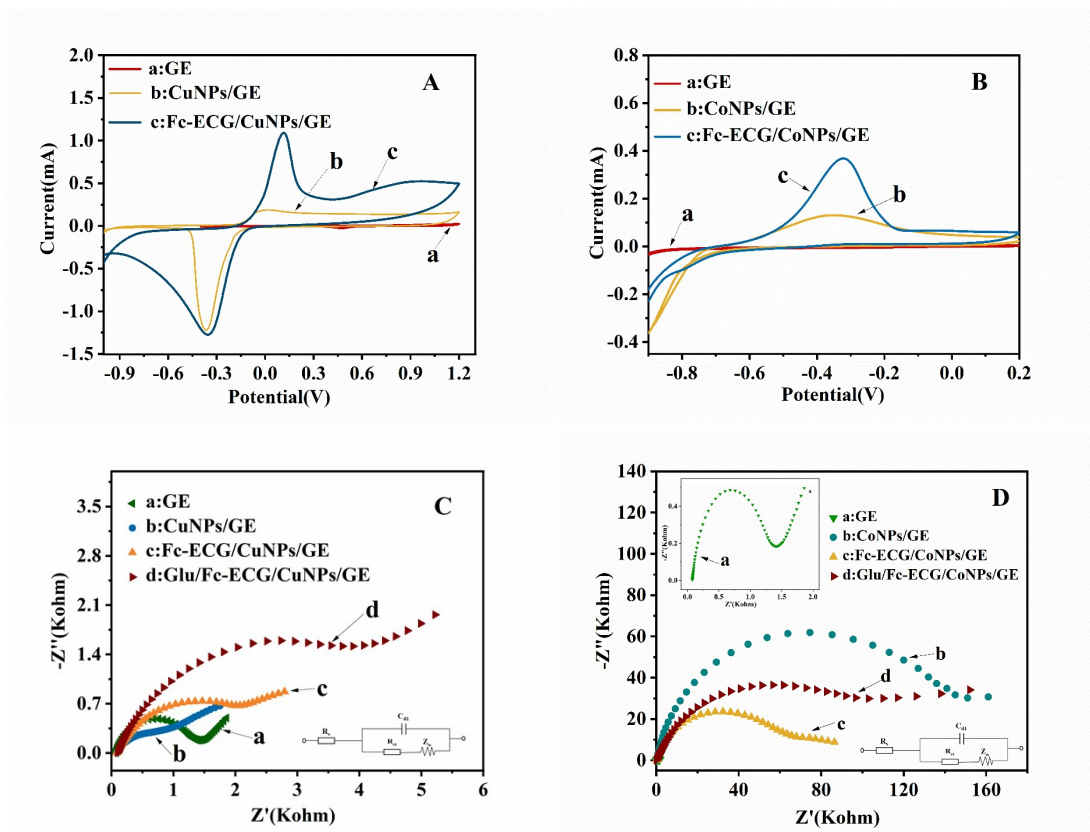

**Fig. S1** (A) CV graphs of GE (a), CuNPs/GE (b), Fc-ECG/CuNPs/GE (c), Glu/Fc-ECG/CuNPs/GE(d) in PBS (pH 7.0); (B) CV graphs of GE (a), CoNPs/GE (b), Fc-ECG/CoNPs/GE (c), Glu/Fc-ECG/ CoNPs/GE (d) in PBS (pH 7.0) (the inset is an enlarged view); (C) EIS plots of GE (a), CuNPs/GE (b), Fc-ECG/CuNPs/GE (c), Glu/Fc-ECG/ CuNPs/GE (d) in 5 mM  $K_4[Fe(CN)_6]/K_3[Fe(CN)_6]$  with 0.1 M KCl solution; (D) EIS plots of GE (a), CoNPs/GE (b), Fc-ECG/CoNPs/GE (c), Glu/Fc-ECG/ CoNPs/GE (d) in 5 mM  $K_4[Fe(CN)_6]/K_3[Fe(CN)_6]$  with 0.1 M KCl solution (the inset is an enlarged view).

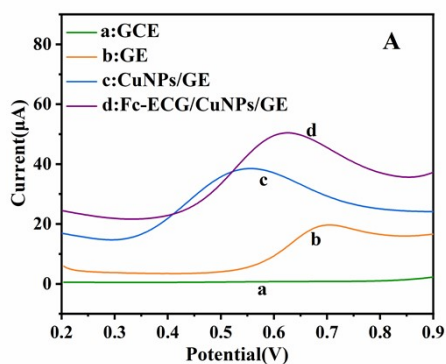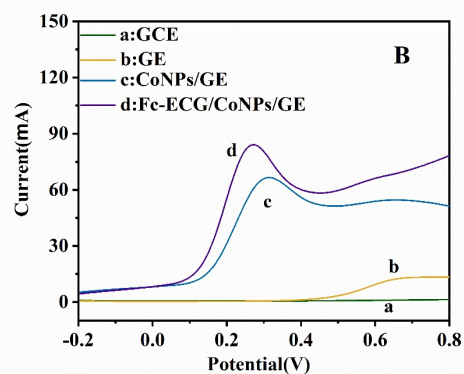

**Fig. S2** (A) DPVs of GCE (a), GE (b), CuNPs/GE (c), Fc-ECG/CuNPs/GE (d) in a mixture of 4 mM Glu and 0.1 M NaOH solution; (B) DPVs of GCE (a), GE (b), CoNPs/GE (c), Fc-ECG/CoNPs/GE (d) in a mixture of 4 mM Glu and 0.1 M NaOH solution;

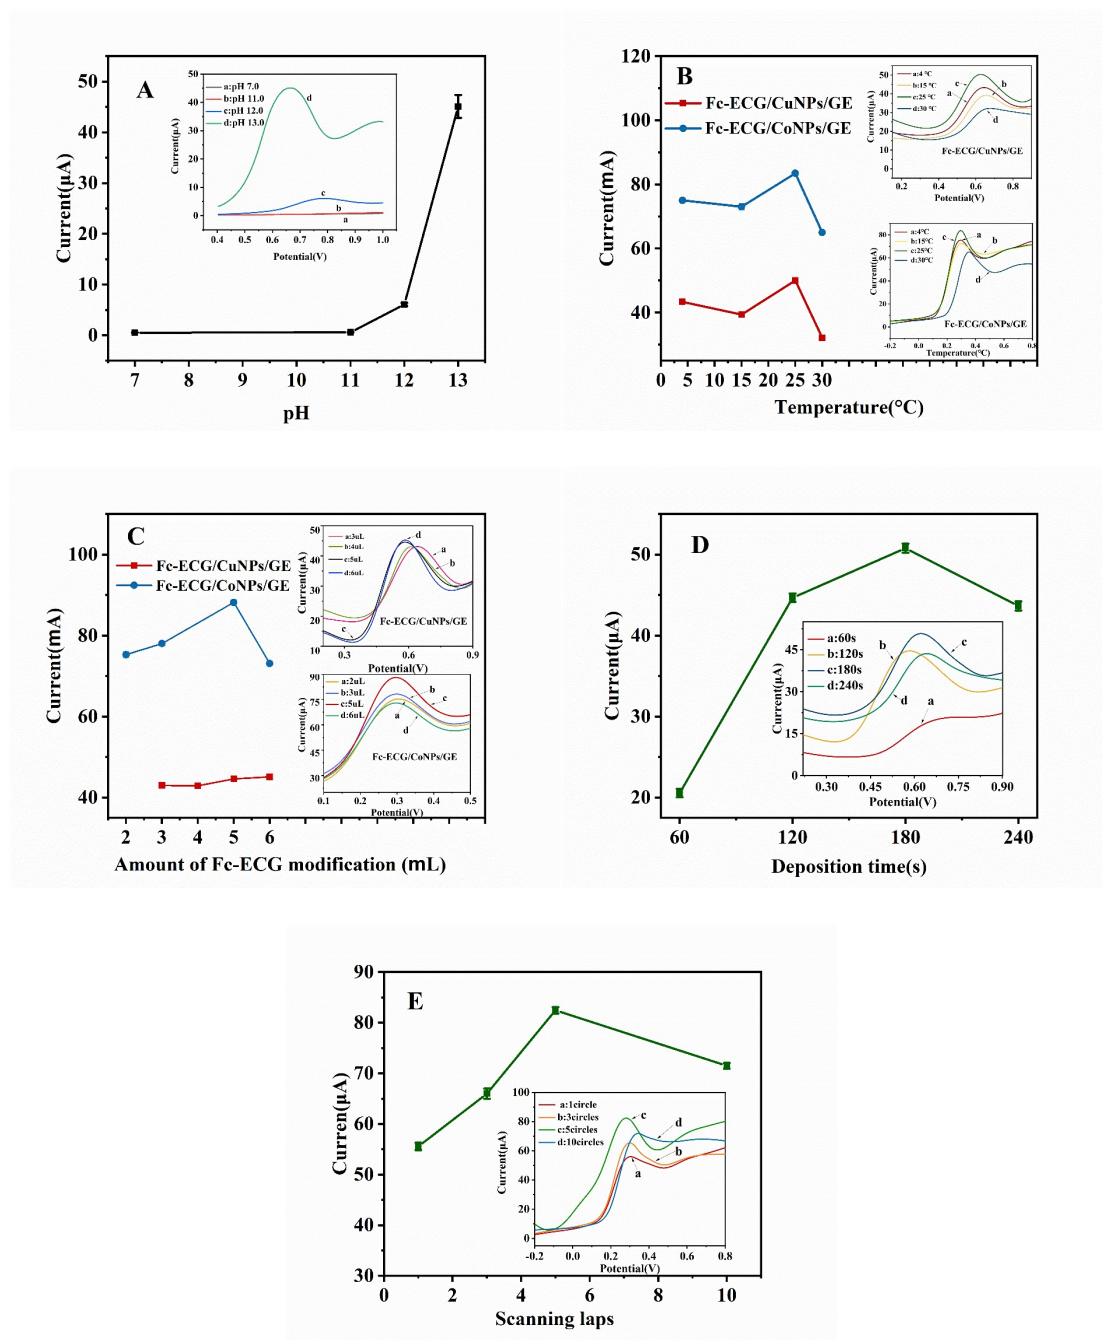

**Fig. S3** Optimization of Fc-ECG/CuNPs/GE and Fc-ECG/CoNPs/GE (the insets are corresponding DPV plots). (A) pH value with bare gold electrode for glucose; (B) Temperature; (C) Amount of Fc-ECG modification, (D) Deposition time of CuNPs by *i-t* technique, (E) Scanning laps for depositing CoNPs by CV technique.
